## Molecular basis of CTCF binding polarity in genome folding

Elphège P. Nora<sup>\*1,2,3,4#</sup>, Laura Caccianini<sup>\*5</sup>, Geoffrey Fudenberg<sup>\*1</sup>, Vasumathi Kameswaran<sup>1,2</sup>, Abigail Nagle<sup>1</sup>, Alec Uebersohn<sup>1</sup>, Kevin So<sup>1</sup>, Bassam Hajj<sup>5</sup>, Agnès Le Saux<sup>6</sup>, Antoine Coulon<sup>5,7</sup>, Leonid A. Mirny<sup>8</sup>, Katherine S. Pollard<sup>1,9,10</sup>, Maxime Dahan<sup>5†</sup>, Benoit G. Bruneau<sup>1,2,3,11#</sup>

\* co-first authors

# corresponding authors

†deceased

1. Gladstone Institutes, San Francisco, CA 94158, USA

2. Roddenberry Center for Stem Cell Biology and Medicine at Gladstone, San Francisco, CA 94158, USA

3. Cardiovascular Research Institute, University of California San Francisco, San Francisco, CA 94143, USA

4. Department of Biochemistry and Biophysics, University of California San Francisco, San Francisco, CA 94143, USA.

5. Laboratoire Physico-Chimie, Institut Curie, PSL Research University, Sorbonne Université, Université Pierre et Marie Curie-Paris, CNRS UMR168, 26, Rue D'Ulm, 75005, Paris, France

6. Institut Curie, PSL Research University, CNRS UMR 3215, INSERM U934, Mammalian Developmental Epigenetics group, F-75005 Paris, France; Sorbonne Université, F-75005 Paris, France

7. Institut Curie, PSL Research University, Sorbonne Université, CNRS UMR3664, Nuclear Dynamics unit, F-75005 Paris, France

8. Institute for Medical Engineering and Science and Department of Physics, Massachusetts Institute of Technology, Cambridge, MA 02139, USA

9. Department of Epidemiology & Biostatistics, Institute for Human Genetics, Quantitative Biology Institute, and Institute for Computational Health Sciences, University of California San Francisco, San Francisco, CA, USA

10. Chan Zuckerberg Biohub, San Francisco, California, USA

11. Department of Pediatrics, University of California San Francisco, San Francisco, CA 94143, USA

Present addresses: AU: University of California Berkeley, Berkeley, CA, USA; AN: University of Washington, Seattle, Washington, USA

Correspondence to E.P.N. ([elphege.nora@ucsf.edu](mailto:elphege.nora@ucsf.edu)) or B.G.B. ([benoit.bruneau@gladstone.ucsf.edu](mailto:benoit.bruneau@gladstone.ucsf.edu))

## 32 **Summary**

33 Current models propose that boundaries of mammalian topologically associating domains (TADs) arise  
34 from the ability of the CTCF protein to stop extrusion of chromatin loops by cohesin proteins  
35 (Merkenschlager & Nora, 2016; Fudenberg, Abdennur, Imakaev, Goloborodko, & Mirny, 2017). While the  
36 orientation of CTCF motifs determines which pairs of CTCF sites preferentially stabilize DNA loops (de Wit  
37 et al., 2015; Guo et al., 2015; Rao et al., 2014; Vietri Rudan et al., 2015), the molecular basis of this polarity  
38 remains mysterious. Here we report that CTCF positions cohesin but does not control its overall binding  
39 or dynamics on chromatin by single molecule live imaging. Using an inducible complementation system,  
40 we found that CTCF mutants lacking the N-terminus cannot insulate TADs properly, despite normal  
41 binding. Cohesin remained at CTCF sites in this mutant, albeit with reduced enrichment. Given that the  
42 orientation of the CTCF motif presents the CTCF N-terminus towards cohesin as it translocates from the  
43 interior of TADs, these observations provide a molecular explanation for how the polarity of CTCF binding  
44 sites determines the genomic distribution of chromatin loops.

## 45 Main text

46 In mammalian genomes, cohesin complexes accumulate at CTCF binding sites, and cohesin-  
47 dependent chromatin loops preferentially engage pairs of CTCF sites with convergent motif orientation  
48 (Rao et al., 2014; Vietri Rudan et al., 2015). Inverting one CTCF motif can lead to repositioning of the  
49 corresponding DNA loop (Bemmel et al., 2019; de Wit et al., 2015; Guo et al., 2015; Sanborn et al., 2015).  
50 Two non-exclusive models may account for both localization of cohesin at CTCF sites and directional DNA  
51 looping. Cohesin could load at CTCF binding sites, downstream of the motif, and initiate loop extrusion  
52 unidirectionally (Nichols & Corces, 2015). Alternatively, cohesin could load throughout TADs and  
53 translocate bi-directionally as it extrudes DNA loops, only stopping when it encounters a CTCF sites in the  
54 proper orientation (Fudenberg et al., 2016; Sanborn et al., 2015).

55 To test these models, we first measured the impact of depleting CTCF on cohesin binding and  
56 positioning on chromosomes. As previous studies using inducible CTCF knock-out reported that cohesin  
57 can still bind 80% of initial sites even after 10 days (Busslinger et al., 2017), we sought to achieve more  
58 efficient depletion. Using a mouse embryonic stem cell (mESC) line in which CTCF can be degraded by the  
59 auxin inducible degron (AID) system (Nora et al., 2017), we observed near-complete disappearance of the  
60 cohesin ring subunit RAD21 by ChIP-seq from its initial position at CTCF peaks (**Figure 1a, b**). However,  
61 spike-in calibration revealed identical amount of chromatin pulled down by a RAD21 antibody in the  
62 absence of CTCF (**Figure 1c**). Thus, while cohesin no longer accumulates at CTCF sites in the absence of  
63 CTCF, it still associates with chromatin, indicating it must be redistributed away from CTCF sites –  
64 supporting the translocation-and-block model.

65 To directly visualize how loss of CTCF may affect cohesin dynamics and association with DNA, we  
66 performed single molecule tracking of RAD21 in WT (**Figure 1 – figure supplement 1a-g**) and CTCF-AID  
67 mESCs (**Figure 1d-g**) by targeting both *Rad21* alleles with a HaloTag. Consistent with previous  
68 measurements (Hansen, Pustova, Cattoglio, Tjian, & Darzacq, 2017), 60% of RAD21 molecules were bound  
69 to chromatin (**Figure 1i**). Depleting CTCF did not affect this fraction, nor the distribution of diffusion  
70 coefficients or the anomalous diffusion exponent of RAD21 (**Figure 1f-i**). Cell cycle and sister chromatid  
71 cohesion were not a confounding effect in these imaging modalities (see Methods) since we obtained  
72 similar results in each single cycling mESCs (**Figure 1 – figure supplement 1g**), and in non-cycling astrocytes  
73 (**Figure 1f-g**). However, CTCF depletion led to a modest but reproducible increase in the number of fast-  
74 diffusing molecules ( $-1 < \text{LogD}_{\text{inst}} < 0$ ), in both cycling and non-cycling cells (**Figure 1f-g**). These fast diffusing  
75 molecules were nevertheless not completely free, since they diffused more slowly than unbound cohesin  
76 ( $\text{LogD}_{\text{inst}} > 0$ ), as estimated from imaging cells blocked in early M phase by means of a 6-hr depletion of  
77 Sororin (**Figure 1 – figure supplement 1h-o**). Taken together with the spike-in ChIP-seq, our results refute  
78 the idea that CTCF promotes bulk loading of cohesin and support a mechanism whereby CTCF acts by  
79 blocking translocating cohesin.

80 We investigated how CTCF blocks cohesin translocation and triggers TAD insulation. Mutational  
81 analysis of CTCF is challenging because CTCF is essential for long-term cell survival (Nora et al., 2017;  
82 Sleutels et al., 2012), and mutations altering CTCF protein stability or CTCF binding will *de facto* alter  
83 cohesin positioning and TAD folding – since insulation of TADs relates quantitatively to CTCF levels (Nora  
84 et al., 2017). To overcome these obstacles, we used a complementation system where inducible CTCF  
85 cDNA transgenes are stably targeted in CTCF-AID cells, so that auxin degrades endogenous CTCF and  
86 doxycycline triggers expression of the CTCF transgene (**Figure 2a**). Precise comparison of expression levels

87 between cell lines was achieved by flow-cytometry for mRuby2, fused in frame to transgenic CTCF. TAD  
88 folding was surveyed across all genotypes by Chromosome Conformation Capture Carbon-Copy (5C) using  
89 a previously validated design (Nora et al., 2017). To calibrate our assay, we analyzed two independent  
90 lines expressing the full-length CTCF cDNA at either high or low level, together with one cell line not  
91 expressing the transgene. Insulation (**Methods**) scaled linearly with transgene expression (**Figure 2b**,  
92 dashed line). Expression of the full-length transgene (high) was approximately one fifth of endogenous  
93 CTCF-AID-eGFP, which is less than half untagged CTCF (**Figure 2 – figure supplement 2a-c**).

94 We first deleted C(577-614), which contains a region expected to mediate the interaction  
95 between CTCF and cohesin based on *in vitro* data (Xiao, Wallace, & Felsenfeld, 2011), and encompasses  
96 the C-terminal internal RNA-binding region, RBR<sub>i</sub> (**Figure 2 – figure supplement 1d and 2a**) (Hansen et al.,  
97 2018; Saldaña-Meyer et al., 2014).  $\Delta$ C(577-614) is expressed at around 60% of level of the full length  
98 transgene, confirming the region contributes to CTCF stability (**Figure 2 – figure supplement 2b**) (Hansen  
99 et al., 2018).  $\Delta$ C(577-614) displayed lower DNA binding by ChIP-seq (**Figure 2 – figure supplement 2e-g**)  
100 and rescued insulation as expected based on its expression level (**Figure 2b and Figure 2 – figure**  
101 **supplement 2c-d**). Altogether, C(577-614) appears dispensable for functionally connecting CTCF and  
102 cohesin *in vivo*, and contributes minimally to TAD folding beyond promoting CTCF binding, at least in the  
103 region surveyed. Another CTCF domain must therefore mediate cohesin blocking and directional loop  
104 retention.

105 We proceeded to establish an additional 12 stable cell lines, each harboring a different mutated  
106 CTCF cDNA, leaving the core of the DNA binding domain intact (central Zinc-finger array, or ZF - **Figure 2a**  
107 **and Figure 2 – figure supplement 1d**). Several CTCF mutants failed to rescue TAD insulation to the extent  
108 expected from their expression levels (**Figure 2b**). Deletion of the entire N-terminal domain  $\Delta$ N(1-265)  
109 had the most dramatic impact (**Figure 2c-d**). Within the N-terminus multiple sub-regions participate to  
110 the ability of CTCF to insulate TADs (**Figure 2b**):  $\Delta$ N(1-89) triggered a mild but detectable insulation defect,  
111 while  $\Delta$ N(179-265) had a more pronounced effect.  $\Delta$ N(264-288), which overlaps one RNA-binding region  
112 and ZF1, as well as mutation of the ZF1 itself (H288R), also led to insulation defects and is characterized  
113 further in a parallel study (Saldaña-Meyer et al., 2019).

114 To understand the chromatin folding defects in  $\Delta$ N(1-265) we measured binding of transgenic  
115 CTCF and endogenous Rad21 by ChIP-seq. Deleting the entire N-terminus did not alter CTCF binding, as  
116 indicated by FLAG pull-down (**Figure 3**). RAD21 enrichment at FLAG-CTCF peaks remained detectable in  
117 the  $\Delta$ N(1-265) mutant, but was reduced two-fold (**Figure 3**). Therefore, proper retention of cohesin at  
118 CTCF sites requires N(1-265), indicating that the CTCF N-terminus either participates in inhibiting cohesin  
119 translocation (thereby promoting insulation), or – non-exclusively – protects blocked cohesin from  
120 unloading (thereby bolstering 5C peaks between CTCF sites - **Figure 4 – figure supplement 1**).

121 Given that deleting the CTCF N-terminus led to milder insulation defects than complete CTCF  
122 depletion, and that deleting the C-terminus had little to no effect, the Zinc-finger array mediates some  
123 degree of insulation and must therefore participate in halting cohesin translocation. The Zinc finger  
124 domain confers to CTCF an unusually long residence time to CTCF for a transcription factor (Agarwal,  
125 Reisser, Wortmann, & Gebhardt, 2017; Hansen et al., 2017), as well as uniquely distorts DNA (MacPherson  
126 & Sadowski, 2010) and positions nucleosomes (Fu, Sinha, Peterson, & Weng, 2008) in a fashion that might  
127 interfere with loop extrusion by cohesin.

128

129           The importance of the CTCF N-terminus draws support from evolutionary data: while the ZF  
130 domain of CTCF is highly conserved across bilateria (Heger, Marin, & Schierenberg, 2009), vertebrate and  
131 invertebrate N-termini are highly divergent. In *Drosophila*, CTCF binding sites also overlap cohesin ChIP-  
132 seq peaks (Li et al., 2015) (**Figure 3 – figure supplement 1**), but do not exhibit motif orientation bias at  
133 domain borders (Matthews & White, 2019) and do not anchor Hi-C peaks (Cubebñas-Potts et al., 2016;  
134 Eagen, Aiden, & Kornberg, 2017). This reinforces further the notion that, while the conserved ZF domain  
135 is an impediment to cohesin translocation, the mammalian N-terminus is required to fully retain cohesin  
136 and stabilize chromatin loops as they appear by Hi-C. While the CTCF N-terminus is highly conserved  
137 across mammals, it is highly divergent from that of its paralog BORIS/CTCF, which is therefore not  
138 anticipated to share the functions of CTCF in genome architecture (Debruyne et al., 2019; Pugacheva et  
139 al., 2015).

140  
141           Altogether, our observations also explain why TAD boundaries are preferentially populated by  
142 pairs of CTCF sites with binding sites in a convergent orientation, and why inverting a CTCF site impairs  
143 chromatin interactions, in spite of leaving cohesin ChIP enrichment unchanged (de Wit et al., 2015).  
144 Indeed, orientation of the CTCF motif ensures that cohesin translocating from the inner portion of TADs  
145 encounters the N-terminus of CTCF (**Figure 4g and Figure 4 – figure supplement 1**). When the N-terminus  
146 is placed C-terminally of the Zinc finger array, CTCF is unable to rescue TAD folding, indicating that  
147 oriented presentation of the N-terminus is crucial (**Figure 2b**). These results pave the way for further  
148 mechanistic dissection of the process, and will guide investigation of the molecular details of how CTCF  
149 and cohesin interact.

150 **References**

- 151 Agarwal, H., Reisser, M., Wortmann, C., & Gebhardt, J. C. M. (2017). Direct Observation of  
152 Cell-Cycle-Dependent Interactions between CTCF and Chromatin. *Biophysical Journal*,  
153 *112*(10), 2051–2055. <https://doi.org/10.1016/j.bpj.2017.04.018>
- 154 Bommel, J. G. van, Galupa, R., Gard, C., Servant, N., Picard, C., Davies, J., ... Heard, E. (2019).  
155 The bipartite TAD organization of the X-inactivation center ensures opposing developmental  
156 regulation of Tsix and Xist. *Nature Genetics*, *51*(6), 1024–1034.  
157 <https://doi.org/10.1038/s41588-019-0412-0>
- 158 Busslinger, G. A., Stocsits, R. R., van der Lelij, P., Axelsson, E., Tedeschi, A., Galjart, N., &  
159 Peters, J.-M. (2017). Cohesin is positioned in mammalian genomes by transcription, CTCF and  
160 Wapl. *Nature*, *544*(7651), 503–507. <https://doi.org/10.1038/nature22063>
- 161 Cubeñas-Potts, C., Rowley, M. J., Lyu, X., Li, G., Lei, E. P., & Corces, V. G. (2016). Different  
162 enhancer classes in Drosophila bind distinct architectural proteins and mediate unique  
163 chromatin interactions and 3D architecture. *Nucleic Acids Research*, gkw1114.  
164 <https://doi.org/10.1093/nar/gkw1114>
- 165 de Wit, E., Vos, E. S. M., Holwerda, S. J. B., Valdes-Quezada, C., Verstegen, M. J. A. M.,  
166 Teunissen, H., ... de Laat, W. (2015). CTCF Binding Polarity Determines Chromatin Looping.  
167 *Molecular Cell*, *60*(4), 676–684. <https://doi.org/10.1016/j.molcel.2015.09.023>
- 168 Debruyne, D. N., Dries, R., Sengupta, S., Seruggia, D., Gao, Y., Sharma, B., ... George, R. E.  
169 (2019). BORIS promotes chromatin regulatory interactions in treatment-resistant cancer cells.  
170 *Nature*, *572*(7771), 676–680. <https://doi.org/10.1038/s41586-019-1472-0>
- 171 Eagen, K. P., Aiden, E. L., & Kornberg, R. D. (2017). Polycomb-mediated chromatin loops  
172 revealed by a subkilobase-resolution chromatin interaction map. *Proceedings of the National*  
173 *Academy of Sciences*, 201701291. <https://doi.org/10.1073/pnas.1701291114>
- 174 Fu, Y., Sinha, M., Peterson, C. L., & Weng, Z. (2008). The Insulator Binding Protein CTCF  
175 Positions 20 Nucleosomes around Its Binding Sites across the Human Genome. *PLOS Genet*,  
176 *4*(7), e1000138. <https://doi.org/10.1371/journal.pgen.1000138>
- 177 Fudenberg, G., Abdennur, N., Imakaev, M., Goloborodko, A., & Mirny, L. A. (2017). Emerging  
178 Evidence of Chromosome Folding by Loop Extrusion. *Cold Spring Harbor Symposia on*  
179 *Quantitative Biology*, *82*, 45–55. <https://doi.org/10.1101/sqb.2017.82.034710>
- 180 Fudenberg, G., Imakaev, M., Lu, C., Goloborodko, A., Abdennur, N., & Mirny, L. A. (2016).  
181 Formation of Chromosomal Domains by Loop Extrusion. *Cell Reports*, *15*(9), 2038–2049.  
182 <https://doi.org/10.1016/j.celrep.2016.04.085>
- 183 Guo, Y., Xu, Q., Canzio, D., Shou, J., Li, J., Gorkin, D. U., ... Wu, Q. (2015). CRISPR Inversion  
184 of CTCF Sites Alters Genome Topology and Enhancer/Promoter Function. *Cell*, *162*(4), 900–  
185 910. <https://doi.org/10.1016/j.cell.2015.07.038>
- 186 Hansen, A. S., Hsieh, T.-H. S., Cattoglio, C., Pustova, I., Darzacq, X., & Tjian, R. (2018). An  
187 RNA-binding region regulates CTCF clustering and chromatin looping. *BioRxiv*, 495432.  
188 <https://doi.org/10.1101/495432>
- 189 Hansen, A. S., Pustova, I., Cattoglio, C., Tjian, R., & Darzacq, X. (2017). CTCF and cohesin  
190 regulate chromatin loop stability with distinct dynamics. *ELife*, *6*, e25776.  
191 <https://doi.org/10.7554/eLife.25776>
- 192 Heger, P., Marin, B., & Schierenberg, E. (2009). Loss of the insulator protein CTCF during  
193 nematode evolution. *BMC Molecular Biology*, *10*(1), 84. [https://doi.org/10.1186/1471-2199-](https://doi.org/10.1186/1471-2199-10-84)  
194 10-84

- 195 Li, L., Lyu, X., Hou, C., Takenaka, N., Nguyen, H. Q., Ong, C.-T., ... Corces, V. G. (2015).  
196 Widespread rearrangement of 3D chromatin organization underlies polycomb-mediated stress-  
197 induced silencing. *Molecular Cell*, *58*(2), 216–231.  
198 <https://doi.org/10.1016/j.molcel.2015.02.023>
- 199 MacPherson, M. J., & Sadowski, P. D. (2010). The CTCF insulator protein forms an unusual  
200 DNA structure. *BMC Molecular Biology*, *11*, 101. <https://doi.org/10.1186/1471-2199-11-101>
- 201 Matthews, N. E., & White, R. (2019). Chromatin Architecture in the Fly: Living without  
202 CTCF/Cohesin Loop Extrusion? *BioEssays*, *41*(9), 1900048.  
203 <https://doi.org/10.1002/bies.201900048>
- 204 Merckenschlager, M., & Nora, E. P. (2016). CTCF and Cohesin in Genome Folding and  
205 Transcriptional Gene Regulation. *Annual Review of Genomics and Human Genetics*, *17*(1),  
206 17–43. <https://doi.org/10.1146/annurev-genom-083115-022339>
- 207 Nichols, M. H., & Corces, V. G. (2015). A CTCF Code for 3D Genome Architecture. *Cell*,  
208 *162*(4), 703–705. <https://doi.org/10.1016/j.cell.2015.07.053>
- 209 Nora, E. P., Goloborodko, A., Valton, A.-L., Gibcus, J. H., Uebersohn, A., Abdennur, N., ...  
210 Bruneau, B. G. (2017). Targeted Degradation of CTCF Decouples Local Insulation of  
211 Chromosome Domains from Genomic Compartmentalization. *Cell*, *169*(5), 930-944.e22.  
212 <https://doi.org/10.1016/j.cell.2017.05.004>
- 213 Pugacheva, E. M., Rivero-Hinojosa, S., Espinoza, C. A., Méndez-Catalá, C. F., Kang, S., Suzuki,  
214 T., ... Lobanenko, V. V. (2015). Comparative analyses of CTCF and BORIS occupancies  
215 uncover two distinct classes of CTCF binding genomic regions. *Genome Biology*, *16*, 161.  
216 <https://doi.org/10.1186/s13059-015-0736-8>
- 217 Rao, S. S. P., Huntley, M. H., Durand, N. C., Stamenova, E. K., Bochkov, I. D., Robinson, J. T.,  
218 ... Aiden, E. L. (2014). A 3D map of the human genome at kilobase resolution reveals  
219 principles of chromatin looping. *Cell*, *159*(7), 1665–1680.  
220 <https://doi.org/10.1016/j.cell.2014.11.021>
- 221 Saldaña-Meyer, R., González-Buendía, E., Guerrero, G., Narendra, V., Bonasio, R., Recillas-  
222 Targa, F., & Reinberg, D. (2014). CTCF regulates the human p53 gene through direct  
223 interaction with its natural antisense transcript, Wrap53. *Genes & Development*, *28*(7), 723–  
224 734. <https://doi.org/10.1101/gad.236869.113>
- 225 Saldana-Meyer, R., Rodriguez-Hernaez, J., Nishana, M., Jacome-Lopez, K., Nora, E. P.,  
226 Bruneau, B. G., ... Reinberg, D. (2019). RNA interactions with CTCF are essential for its  
227 proper function. *BioRxiv*, 530014. <https://doi.org/10.1101/530014>
- 228 Sanborn, A. L., Rao, S. S. P., Huang, S.-C., Durand, N. C., Huntley, M. H., Jewett, A. I., ...  
229 Aiden, E. L. (2015). Chromatin extrusion explains key features of loop and domain formation  
230 in wild-type and engineered genomes. *Proceedings of the National Academy of Sciences*,  
231 *112*(47), E6456–E6465. <https://doi.org/10.1073/pnas.1518552112>
- 232 Sleutels, F., Souchit, W., Bartkuhn, M., Heath, H., Dienstbach, S., Bergmaier, P., ... others.  
233 (2012). The male germ cell gene regulator CTCFL is functionally different from CTCF and  
234 binds CTCF-like consensus sites in a nucleosome composition-dependent manner. *Epigenetics*  
235 *Chromatin*, *5*(8). Retrieved from [http://www.biomedcentral.com/content/pdf/1756-8935-5-](http://www.biomedcentral.com/content/pdf/1756-8935-5-8.pdf)  
236 [8.pdf](http://www.biomedcentral.com/content/pdf/1756-8935-5-8.pdf)
- 237 Vietri Rudan, M., Barrington, C., Henderson, S., Ernst, C., Odom, D. T., Tanay, A., & Hadjur, S.  
238 (2015). Comparative Hi-C reveals that CTCF underlies evolution of chromosomal domain  
239 architecture. *Cell Reports*, *10*(8), 1297–1309. <https://doi.org/10.1016/j.celrep.2015.02.004>

240 Xiao, T., Wallace, J., & Felsenfeld, G. (2011). Specific Sites in the C terminus of CTCF interact  
241 with the SA2 subunit of the cohesin complex, and are required for cohesin dependent  
242 insulation activity. *Molecular and Cellular Biology*. <https://doi.org/10.1128/MCB.05093-11>  
243



244 **Figures**

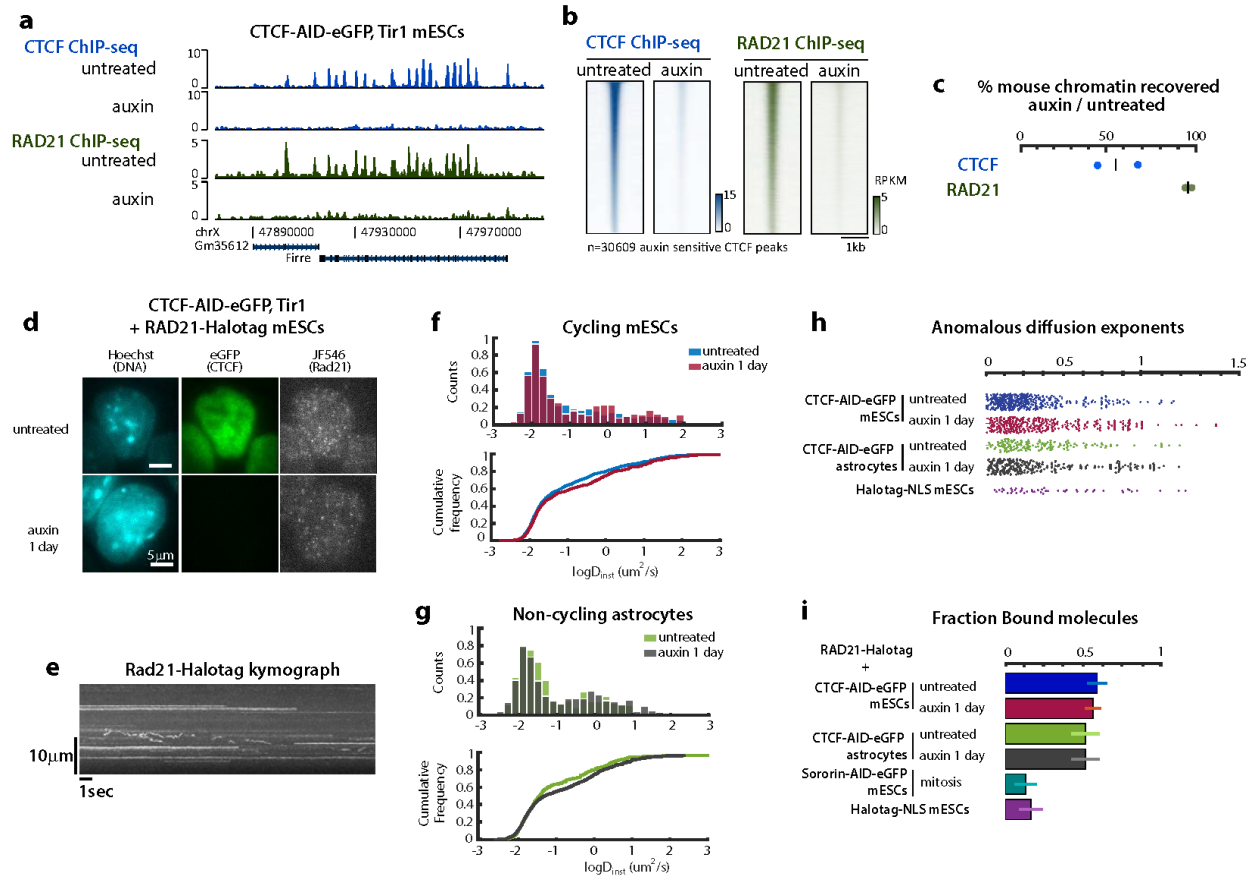

245

246 **Figure 1 | CTCF acts as a positioning but not a loading factor for cohesin**

247 **a** and **b**, Rad21 ChIP-seq enrichment at CTCF peaks is lost after depleting CTCF in CTCF-AID mESCs.

248 **c**, Percentage of ChIP-seq reads mapping to mouse versus spike-in (Drosophila) genomes, using  
249 antibodies against either mouse CTCF or mouse Rad21 in CTCF-AID mESCs, normalized to values  
250 obtained before CTCF depletion by auxin. Each replicate is plotted separately.

251 **d**, HILO imaging of single endogenous cohesin molecules in live CTCF-AID RAD21-Halotag knockin mESCs  
252 labeled with limiting JF546 ligand (50ms acquisitions).

253 **e**, Part of a kymograph generated by an xy line scan across a single cell, illustrating the various diffusion  
254 behaviors of RAD21-Halotag in mESCs (50ms acquisitions).

255 **f**, The distribution of diffusion coefficients ( $D_{inst}$ ) of Rad21 molecules, although significantly different  
256 statistically, is only mildly altered by CTCF depletion. This slight increase in the number of fast diffusing  
257 molecules is observed both in cycling mESCs and **g**, non-cycling astrocytes. 50ms acquisitions. KS test:  
258  $p=0.0196$  for mESCs and  $p=0.0014$  for astrocytes, pooling trajectories from all cells.

259 **h**, anomalous diffusion exponents of RAD21 trajectories (50ms acquisitions) indicating that Rad21  
260 molecules imaged are overwhelmingly sub-diffusive ( $<1$ ).

261 **i**, CTCF depletion does not alter the fraction of bound cohesin (5ms acquisitions). Mitotic block triggered  
262 by depleting Sororin serves as a positive control for free diffusing cohesin, since most cohesin is  
263 unloaded in prophase. Means with standard deviation. See Methods for detailed statistics.

264

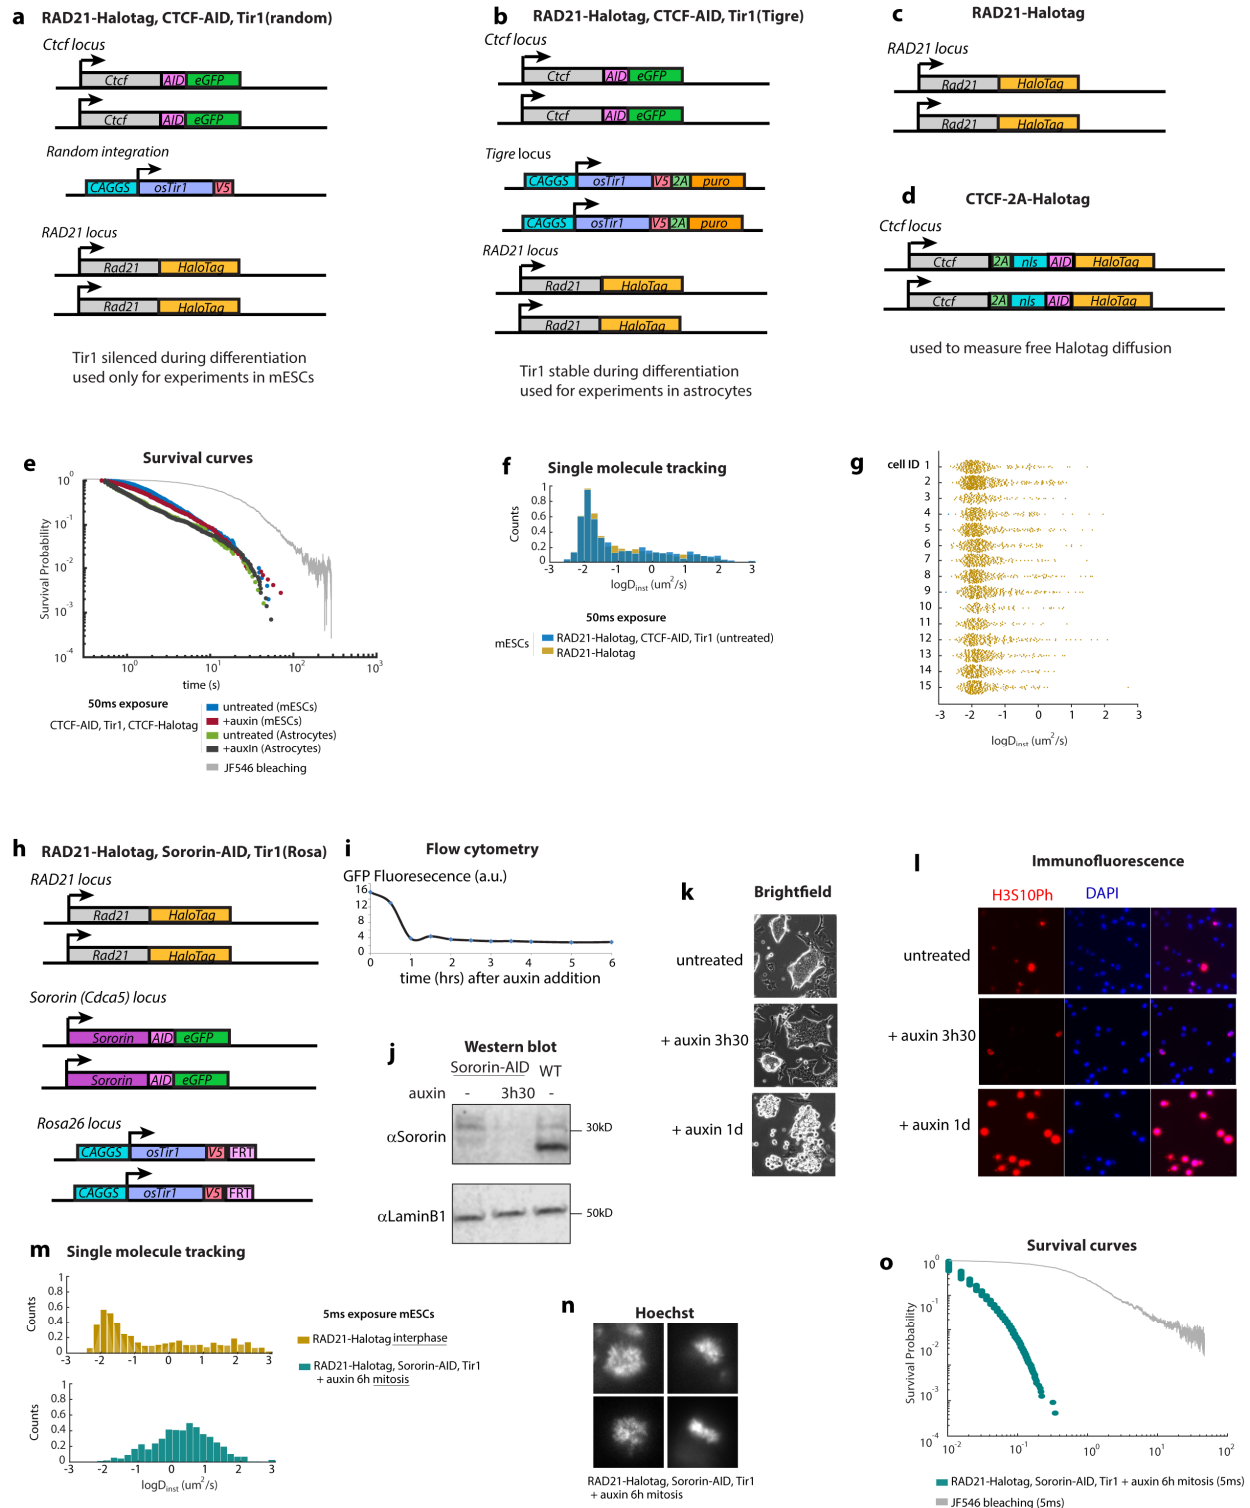

265

266 **Figure 1 – figure supplement 1 | Supporting information regarding RAD21 single molecule tracking in**  
 267 **live cells**

268 **a - d**, detailed genotype of the Halotag cells used for live cell single molecule imaging.

269 **e**, survival curves estimated by combining and rescaling data acquired at 5, 50 and 500ms in CTCF-AID,

270 RAD21-Halotag mESCs. Survival Probability computed from data acquired with continuous imaging at  
271 50ms exposure. Statistics: mESC untreated: 507 trajectories; mESC +auxin: 731 trajectories; astrocytes  
272 untreated: 628 trajectories; astrocytes +auxin: 1090 trajectories N = 15 cells per condition.  
273 **f**, Similar distribution of RAD21-Halotag diffusion coefficient in cells with or without CTCF-AID  
274 **g**, RAD21-Halotag single mESCs display similar Diffusion coefficients  
275 **h**, detailed genotype of the Sororin-AID-eGFP, Tir1, RAD21-Halotag cells  
276 **i**, depletion kinetics of Sororin-AID after auxin addition using flow cytometry for GFP in mESCs  
277 **j**, Western blot indicating destabilization of Sororin after addition of the AID tag and complete  
278 disappearance after auxin treatment  
279 **k**, brightfield imaging of live Sororin-AID-eGFP mESCs illustrating the accumulation of round refringent  
280 mitotic cells after incubation with auxin for 1 day (doubling time of parental cells = 12-14hrs)  
281 **l**, H3S10 immunofluorescence confirming the accumulation of mitotic cells after auxin treatment of  
282 Sororin-AID cells  
283 **m**, rapid diffusion coefficients observed mitotic cells  
284 **n**, examples of the mitotic figures in cells analyzed  
285 **o**, RAD21-Halotag binding events detected in mitotic cells have very short survival time  
286

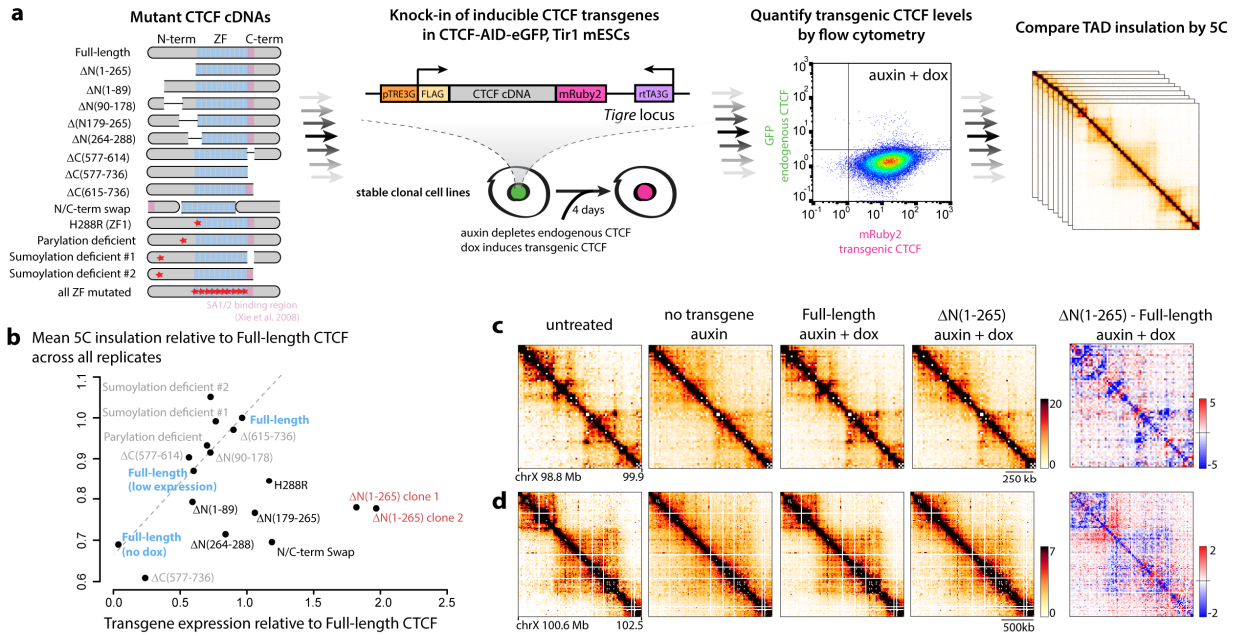

287

288 **Figure 2 | Deletion scanning reveals aminoterminal domains of CTCF mediate TAD folding**

289 **a**, Experimental pipeline for the mutational analysis of CTCF using stable transgenic mESCs. Red stars  
 290 indicate amino-acid substitutions as detailed in the Methods. Flow cytometry confirming homogenous  
 291 induction of the transgenes (only full-length is shown). Gates were placed using untagged cells.  
 292 **b**, Summary of 44 5C experiments across 16 stable mESC lines treated with dox and auxin. Each data  
 293 point is the mean of the insulation scores at the 6 TAD boundaries initially detected in WT untreated  
 294 samples, averaged across at least two 5C replicates, and presented as ratios relative to insulation  
 295 measured in the full-length CTCF transgene. Transgene expression values correspond to flow-cytometry  
 296 means across at least two replicates. The dashed line is the linear regression indicating how insulation  
 297 depends on transgene expression for full-length CTCF, and was obtained by comparing cell lines with  
 298 either high, low or no full-length transgene expression. Transgenes with all zinc fingers (ZFs) mutated  
 299 were poorly expressed and not assessed by 5C.  
 300 **c**, and **d** snapshots of 5C data binned at 15kb, and corresponding differential heatmaps highlighting  
 301 folding defects in the  $\Delta$ (1-265) mutants.

302

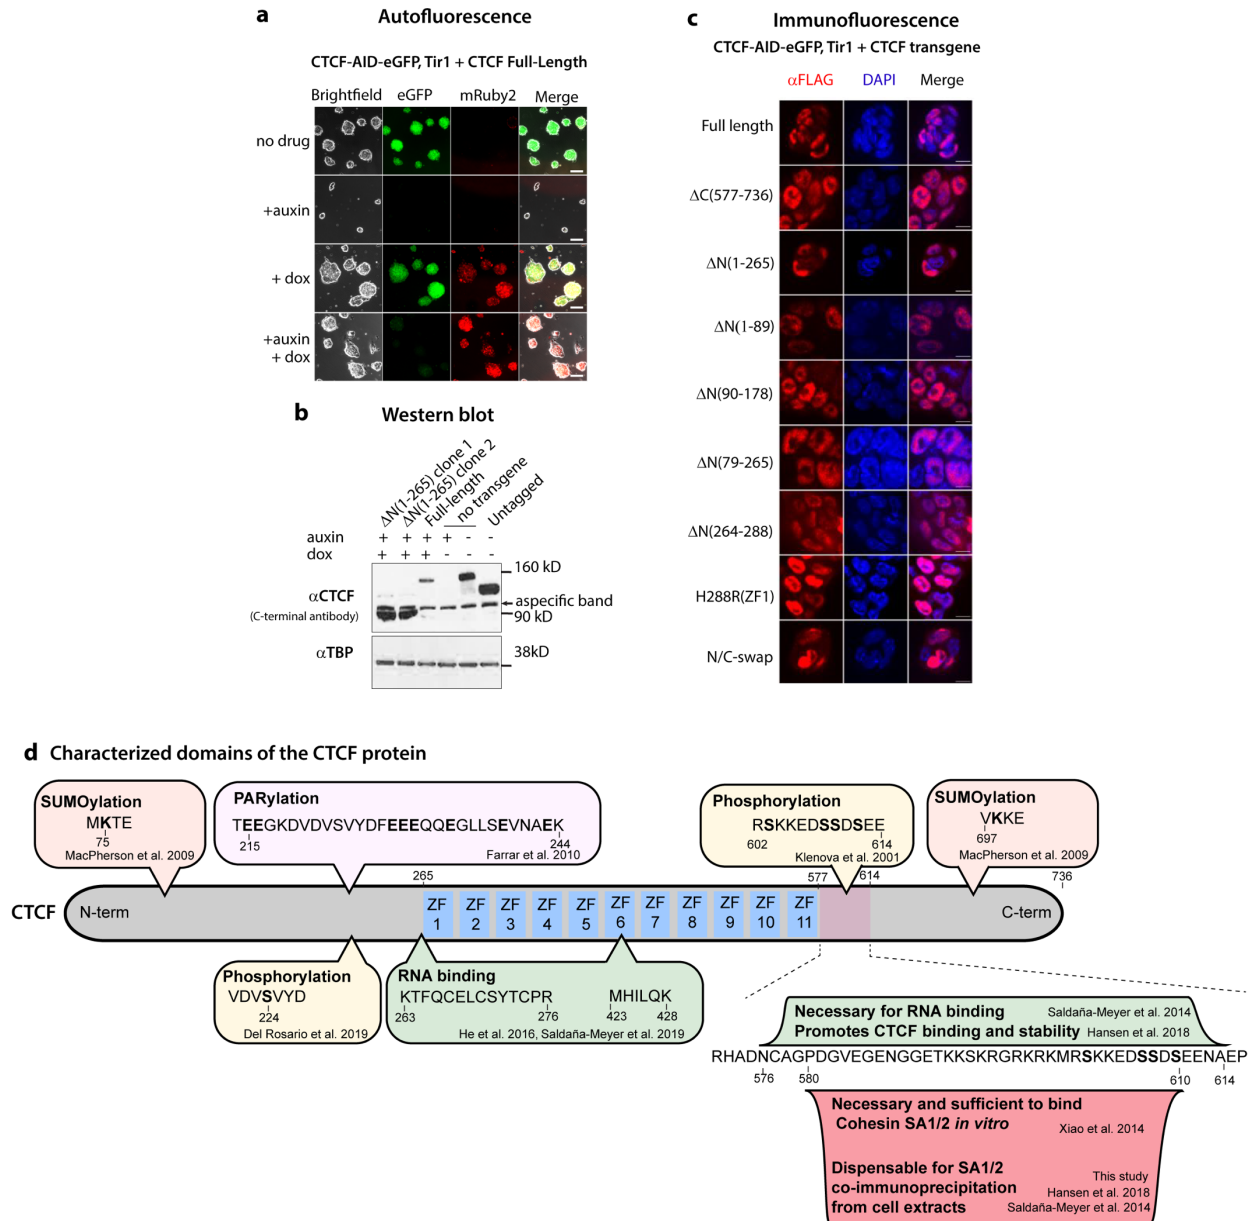

303

304 **Figure 2 – figure supplement 1 | Supporting information regarding the CTCF complementation system**

305 **a**, Brightfield images of live complemented mESCs after 4 days of treatment. scale bar = 100µm.

306 **b**, Western blot with a C-terminal antibody after 2 days of treatment (Milipore 07-729) confirming  
307 slightly higher expression of the CTCF Δ(1-265)

308 **c**, all CTCF truncation analyzed displayed nuclear localization using Immunofluorescence against the  
309 FLAG tag after 2 days of treatment. scale bar = 10µm.

310 **d**, schematic depiction of known functional and post-translationally modified sites in CTCF. Amino-acid  
311 numbers refer to the mouse protein. When information was only available in humans, orthologous  
312 amino-acids are reported on the figure.

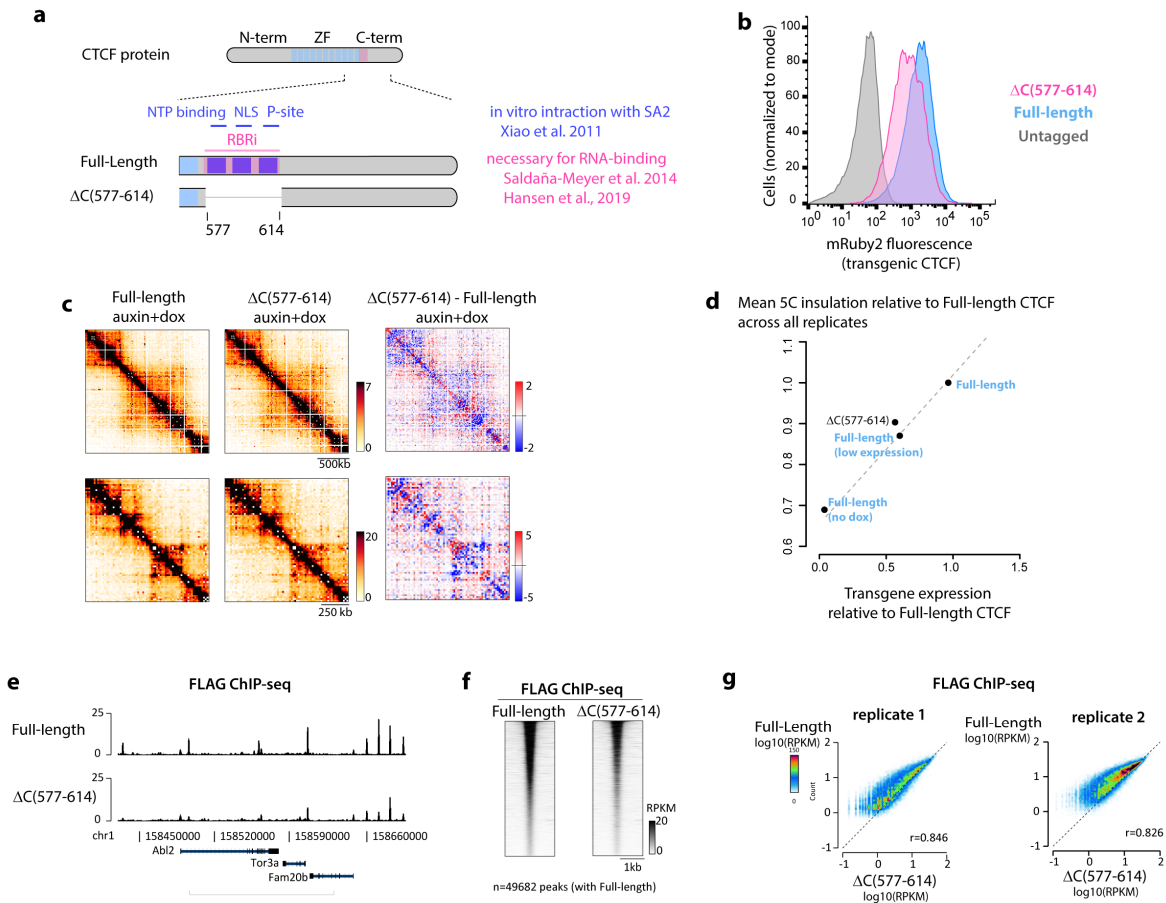

313

314

315 **Figure 2 – figure supplement 2 | C(577-614) appears dispensable for connecting CTCF and cohesin**  
 316 **functionally**

317 **a**, schematic depiction of the position of the Xiao et al. 2011 cohesin SA interaction domain and C-  
 318 terminal RNA binding region (RBRi).

319 **b**, flow cytometry illustrating lower expression level of the  $\Delta C(577-614)$  transgenic CTCF

320 **c**, 5C snapshots in  $\Delta C(577-614)$  binned at 15kb.

321 **d**, excerpt of Figure 2b displaying only the  $\Delta C(577-614)$  mutant.

322 **e-g**,  $\Delta C(577-614)$  displays lower overall binding to DNA by ChIP-seq than control full-length CTCF with  
 323 higher transgene expression

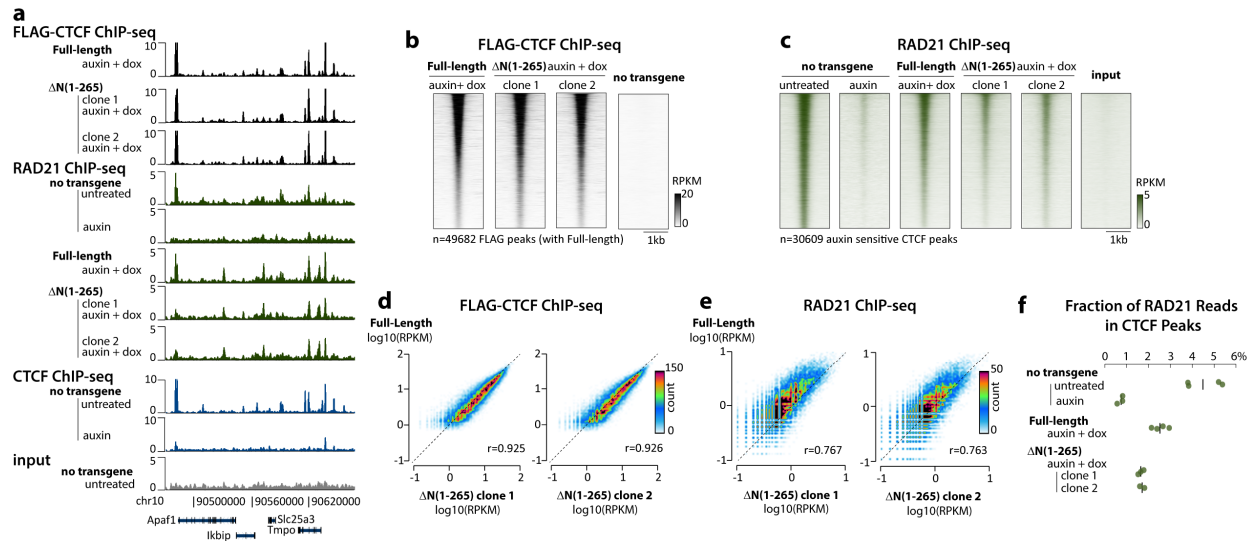

324

325 **Figure 3 | The CTCF N-terminus participates in but is not strictly required for cohesin positioning at**  
326 **CTCF sites**

327 **a**, ChIP-seq tracks snapshot, **b-c**, density plots **d-e**, scatter plots and **f**, Fraction of Reads in Peak (FRIP)  
328 scores indicates that RAD21 is still detected at CTCF peaks (Nora et al., 2017) in cells expressing CTCF  
329  $\Delta N(1-265)$ , albeit with a two-fold reduced enrichment compared to the full-length CTCF transgene.

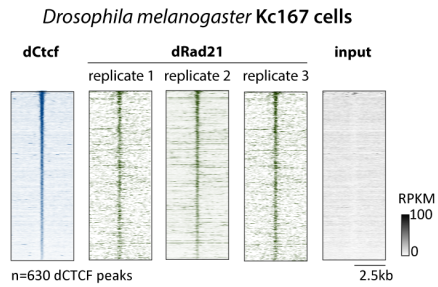

330

331 **Figure 3 –figure supplement 1 | Rad21 is enriched at CTCF binding sites in Drosophila cells**

332 Density plots of CTCF and Rad21 ChIP-seq signal centered at CTCF peaks in Drosophila Kc167 cells(Li et  
333 al., 2015).



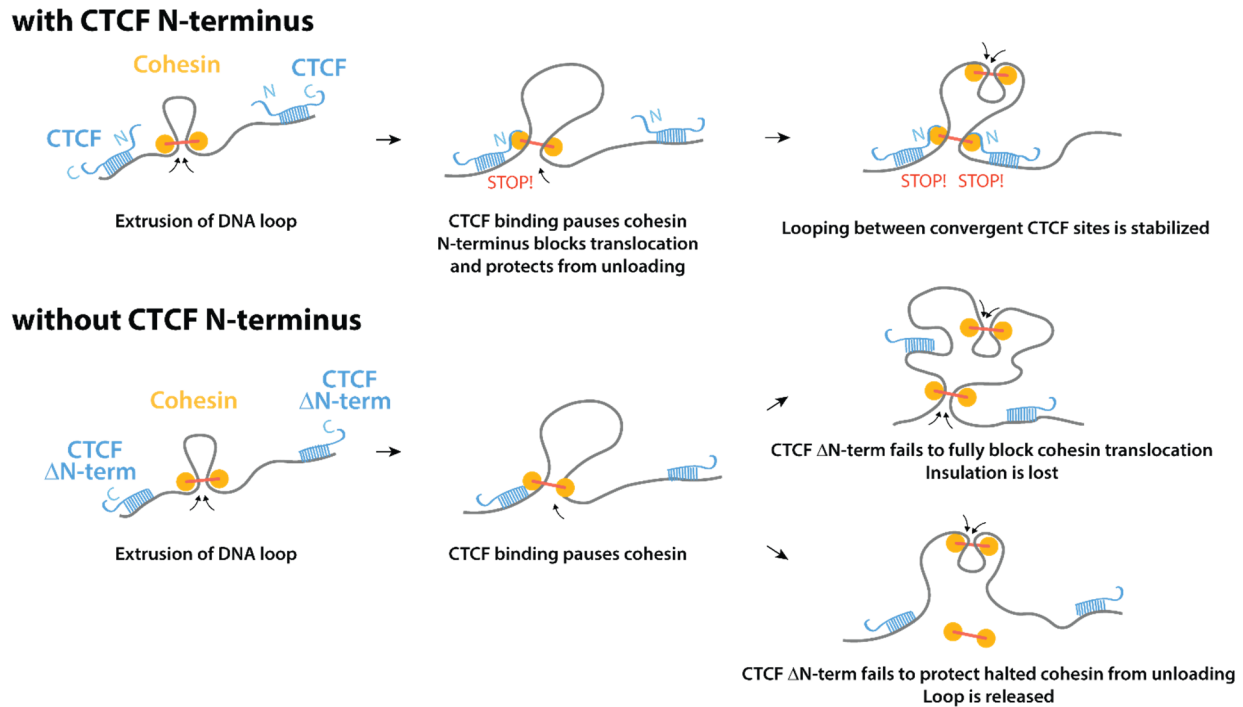

334

335

336 **Figure 4 | Summary model for the role of the CTCF N-terminus in chromosome folding**

337 Because of the non-palindromic nature of the CTCF DNA motif, the effect of the CTCF N-terminus on  
 338 cohesin retention and DNA loop stabilization is polarized to one side of CTCF binding site. Altogether,  
 339 these events results in pairs of interacting TAD boundaries being preferentially populated by CTCF motifs  
 340 in convergent orientation. Upon deleting the N-terminus of CTCF, cohesin occupancy is diminished but  
 341 still detectable, indicating that cohesin still pauses upon encountering bound CTCF sites. Loss of cohesin  
 342 occupancy may reflect either or both decreased ability of truncated CTCF to block cohesin (leading to  
 343 insulation defects) as well as decreased ability of truncated CTCF to protect halted cohesin from unloading  
 344 (leading to loss of the DNA loop).

### a N-terminal encounter

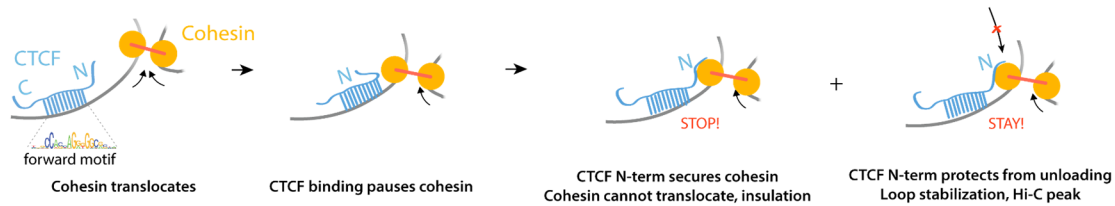

### b C-terminal encounter

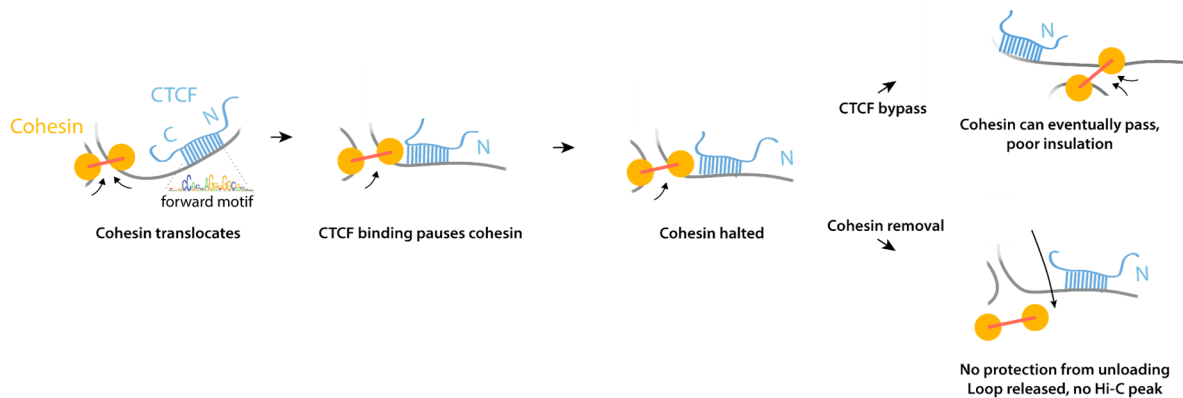

345

346

### 347 Figure 4 - supplement 1 | Models for Cohesin encountering either the N- or C-terminal sides of CTCF

348

349 **a**, Upon encountering a bound CTCF site cohesin halts, irrespective of motif orientation. Our observations  
350 indicate that CTCF then employs multiple amino-terminal subdomains, to block further translocation of  
351 cohesin and prevent its unloading.

352 **b**, A similar sequence of events occurs when cohesin encounters normal CTCF from the C-terminal side or  
353 N-terminus truncated CTCF from either side: CTCF binding pauses cohesin, and resolution of that pause  
354 can involve either eventually bypassing the CTCF site (*e.g.* as CTCF proteins exchange or by passing over),  
355 resulting in with no or poor insulation detected by 5C. Alternatively and non-exclusively, paused cohesin  
356 is unloaded, likely through PDS5/WAPL, releasing the DNA loop.

357

358

359

360

361 **Acknowledgments:** This manuscript is dedicated to the memory of Maxime Dahan, who supervised LC.  
362 We thank Julia Ronsch, Christel Picard and Edith Heard for support with tissue culture. We are grateful  
363 to: Mathieu Coppey for mentoring LC; Luke Lavis, Pierre-Antoine Defossez, Heinrich Leonhardt, David  
364 Spector for reagents; Anders Hansen and Maxime Woringer for insight on single-molecule imaging;  
365 Mads Lerdrup for support with the Easeq software; Joke van Bommel and Anton Goloborodko and Erika  
366 Anderson for critical reading of the manuscript. We thank the Gladstone Flow Cytometry, Genomics,  
367 Histology and Microscopy, and Stem Cell Cores for their excellent services.

368 **Funding:** Research in the groups of BGB and KSP was supported by NHLBI (Bench to Bassinet program  
369 UM1HL098179), Gladstone institutes (including BioFulcrum program), Younger Family Fund and UCSF  
370 Cardiovascular Research Institute. Research in the group of MD was supported by the FRM  
371 grants FDT201805005225 and DEI20151234398, the France-BioImaging infrastructure Grant (ANR-10-  
372 INBS-04 Investments for the future) and the Institut Curie (PIC3i project). LAM and MA were supported  
373 by the MIT-France Seed Fund and NIH grant GM114190. EN was supported by an HFSP postdoctoral  
374 fellowship and UCSF. LC was supported by the international Curie PhD program.

375 **Author Contributions :** EPN designed the study with GF, LAM, MD and BGB. EPN created transgenic cell  
376 lines, performed and analyzed ChIP-seq, 5C, immunofluorescence, designed and analyzed F3H. LC  
377 performed and analyzed single molecule imaging with help of BH, ALS, AC. GF analyzed 5C data and helped  
378 in the design of the study. KS, AN, AU provided support for cloning and tissue culture, and KS performed  
379 and analyzed F3H as well as Western blots. VK performed ChIP-seq experiments. KSP provided support  
380 for bioinformatic analyses. EPN wrote the manuscript with input from all authors, particularly GF. EPN  
381 directed the project with BGB.

382 **Competing interests:** none.

383 **Correspondance and requests for materials** should be addressed to EPN or BGB. Key plasmids will be  
384 available through Addgene.

## Methods

### Cell culture

Parental WT mESCs E14Tg2a (karyotype 19, XY; 129/Ola isogenic background) and subclones were cultured in DMEM+Glutamax (ThermoFisher cat 10566-016) supplemented with 15% Fetal Bovine Serum (ThermoFisher SH30071.03), 550 $\mu$ M b-mercaptoethanol (ThermoFisher 21985-023), 1mM Sodium Pyruvate (ThermoFisher 11360-070), 1X non-essential amino-acids (ThermoFisher 11140-50) and 10<sup>4</sup>U of Leukemia inhibitory factor (Millipore ESG1107). Cells were maintained at a density of 0.2-1.5x10<sup>5</sup> cells / cm<sup>2</sup> by passaging using TrypLE (12563011) every 24-48h on 0.1% gelatin-coated dishes (Millipore cat ES-006-B) at 37°C and 7% CO<sub>2</sub>. Medium was changed daily when cells were not passaged. Cells were checked for mycoplasma infection every 3-4 months and tested negative.

To establish neural progenitors and astrocytes, CTCF-AID mESCs were seeded at around 0.1 million cells in a 75cm<sup>2</sup> gelatinized dish in mESC medium. The following day cells were rinsed twice in 1X PBS and switched to N2B27 medium (50% DMEM/F12 medium: Gibco 31330-038, 50% Neurobasal medium: Gibco 21103-049, 1X Glutamax Gibco 35050061, 0.5X B27 Gibco 17504-044, 1X N2 Millipore SCM012, 0.1mM 2-mercaptoethanol (ThermoFisher 21985023) and changed daily. After 7 days cells were detached using TrypLE and seeded on non-gelatinized bacterial dishes for suspension culture at 3 million cells per 75cm<sup>2</sup> and cultured in N2B27 containing 10ng/mL EGF and FGF (Peprotech 315-09 and 100-18B). After 3 days floating aggregates were seeded on gelatinized dishes. After 2-4 days cells were dissociated using Accutase and passaged twice on gelatinized dishes in N2B27+EGF+FGF and cryopreserved after expansion. For differentiation into quiescent astrocytes adherent NPC cultures were washed twice with N2B27 and cultured for at least 48h with N2B27+ 10ng/mL BMP4 (R&D Systems 314-BP-010).

Schneider's Drosophila Line 2 (S2) cells were obtained from ATCC and cultured in Schneider's Drosophila Medium (ThermoFisher 21720001) with 10% Heat inactivated FBS (ThermoFisher SH30071.03) at 28°C according to the ThermoFisher protocol.

AID depletion was triggered using 500mM of Indole-3-acetic acid sodium salt (auxin analog) Sigma-Aldrich Cat #I5148 final diluted in culture medium. TetO promoters were induced using of 1mg/ml doxycycline final diluted in culture medium. Single molecule imaging in CTCF-AID cells was performed after 1 day of auxin treatment, to minimize secondary effects. ChIP-seq was performed after 2days of auxin (+dox) treatment to enable comparison with previous ChIP-seq and Hi-C data<sup>2</sup>. 5C was performed after 4 days of auxin (+dox) of treatment, where the effect of CTCF depletion and the difference with the CTCF full-length transgene rescue were maximal<sup>2</sup>.

### Plasmid Construction

Plasmid were assembled using Gibson assemble (SBI MC010B-1) or restriction-ligation. Mouse cDNAs were used for CTCF transgenes, and cloned after by reverse-transcription of mESC mRNAs (SuperscriptIII, ThermoFisher). Targeting vectors driving doxycycline-inducible CTCF cDNAs were assembled by modifying the pEN366 vector<sup>2</sup>.

Parylation-deficient CTCF was created by alanine substitution of the eight glutamic acid residues between position 215 and 244, known to obliterate Parylation<sup>4</sup>. Sumoylation sites were mutated. The N terminal Sumoylation site was obliterated by introducing the previously described<sup>5</sup> K75R mutation.

The list of plasmids generated in this study can found in the supplementary information. Annotated plasmid sequences are available as supplementary information. Key plasmids will be available through Addgene.

## Genome engineering

For transfection, plasmids were prepared using the Nucleobond Maxi kit (Macherey Nagel) followed by isopropanol precipitation. Constructs were not linearized.

To knock in TetO-CTCF cDNAs at the *Tigre* locus, CTCF-AID, Tir1(random insertion) clone EN52.9.1 (Nora et al. 2017) was transfected using using the Neon system (Thermofisher) using a 100 $\mu$ L tip with 1 million cells at 1400V, 10ms and 3 pulses. 5 $\mu$ g of the Cas9-*Tigre* sgRNA vector pX330-EN1201 (Nora et al. 2017 Addgene #92144) and 15 $\mu$ g of targeting construct. After electroporation cells were seeded in a 9cm<sup>2</sup> well and left to recover for 48h. Cells were plated at limited dilution and grown for around 7 days in the presence of puromycin at 1 $\mu$ g/mL until single colonies could be picked. Individual clones were genotyped by PCR and analyzed by flow cytometry for induction of the CTCF-mRuby2 transgene on a MACSQuant analyzer. Homozygous clones were identified by PCR and those driving expression as close as possible as the control cells harboring the full-length CTCF transgene were expanded and cryopreserved. See supplementary information.

To knock in the Halotag at RAD21, mESCs (E14Tg2a or CTCF-AID, Tir1(random)) were transfected using using the Neon system (Thermofisher) using a 100 $\mu$ L tip with 1 million cells at 1400V, 10ms and 3 pulses. 5 $\mu$ g of the Cas9-*Tigre* sgRNA vector pX330-EN1082 (see supplementary information) and 15 $\mu$ g of targeting construct pEN313 (see supplementary information). After electroporation cells were seeded in a 9cm<sup>2</sup> well and left to recover for 48h, geneticin was then added to the media at 200 $\mu$ g/mL and cells were selected as a heterogenous pool of homozygous and heterozygous cells for around 10 days, at which stage over 70% of the cells showed nuclear fluorescence after addition of fluorescent Halotag ligand. Cells were then transfected with the Neon system using a 10 $\mu$ L tip and 0.1 million cells with 250ng of a flippase-expressing plasmid (pCAGGS-FlpO-IRES-puro)<sup>6</sup> in order to trigger FRT recombination and excision of the blasticidin selection cassette. After electroporation cells were seeded in a 9cm<sup>2</sup> well and left to recover for 48h and transferred into a 78cm<sup>2</sup> petri dish from which two serial 1:10 dilution were seeded in an additional two dishes. After 7-8 days of culture without antibiotic selection single colonies were manually picked, transferred into a 96-well plate, dissociated and re-plated. Clones were then genotyped by PCR for homozygous insertion of the Halotag, checked for geneticin sensitivity, expanded and cryopreserved.

We noticed that the RAD21-Halotag cells derived from the CTCF-AID, Tir1(random), clone EN52.9.1, stopped responding to auxin upon differentiation. We therefore used RAD21-Halotag, introduced Tir1 at the *Tigre* locus using pX330-EN1201 (addgene #92144) and pEN396 vectors (addgene #92142), and isolated a homozygous knockin clone which we used to introduce an AID-eGFP cassette at both endogenous alleles of CTCF using pEN244 (addgene #92144) and (pCAGGS-FlpO-IRES-puro)<sup>6</sup>. We noticed that when targeted at *Tigre* Tir1 expression remained stable upon differentiation.

To create Sororin-AID cells, RAD21-Halotag cells were transfected using the Neon system (ThermoFisher) using a 100 $\mu$ L tip with 1 million cells at 1400V, 10ms and 3 pulses. 5 $\mu$ g of the Cas9-*Tigre* sgRNA vector pX330-EN1680 (see supplementary information) and 15 $\mu$ g of targeting construct pEN487 (see supplementary information). A homozygous clone was isolated, used for co-transfection with (pCAGGS-FlpO-IRES-puro)<sup>6</sup> to remove the blasticidin selection cassette. Tir1 was then introduced at rosa26 using vectors pX330-EN479 (addgene #86234) and pEN114 (addgene # 92143). Homozygous clones were identified by PCR.

The list of cell lines generated in this study and the corresponding CRISPR sgRNAs can be found in the supplementary information.

## Live single molecule imaging

### Microscopy set up

Single molecule imaging was performed on an epifluorescence inverted microscope (IX71, Olympus) in HILO illumination<sup>7</sup>. 500mm achromatic lens conjugates the slit to the specimen plane to achieve a proper HILO. The lens focuses the excitation beam on the back focal plane of a 150X objective lens (UApo N 150X TIRF 1.45 NA, O.I., Olympus, France). The lens is mounted on a translation stage together with a metallic mirror that sends the beam to the microscope. Displacement of the translation stage allows a precise positioning of the focused beam at the back focal plane of the objective without influencing the lens-BFP distance. Thanks to this configuration it is possible to adjust the tilting of the laser beam at the output of the objective and thus the effective thickness of the tilted light sheet excitation at the specimen.

Efficient separation between the excitation and emission was achieved with a fluorescence cube containing a quad band dichroic mirror (FF409/493/573/652-Di02-25x36, SEMROCK) together with adequate emission filters. The setup is provided with a 561 nm laser (Sapphire 561, Coherent, Santa Clara, CA, USA), a 488 nm laser (488LM-200, ERROL, France) and a 405 nm laser (405LM-200, ERROL, France). Lasers were tuned via an acousto-optical tunable filter (AOTFnc-400-650-TN, A&A Optoelectronic, France) and controlled by a home-made interface in Micromanager (Edelstein et al, 2014). Signal was acquired with an EM-CCD camera (iXonEM DV860DCS-BV, Andor, Ireland) run in frame-transfer mode

### Acquisitions

To perform single molecule tracking experiments, cells (both mESC and Astrocytes) were grown on circular petri dishes with glass bottom (MatTek, Part No: P35G-1.5-14-C) coated with fibronectin (Millipore SAS cat# FC010-5mg). Cells were seeded at a density of 3x10<sup>5</sup>/cm<sup>2</sup> the day before the experiments, in culture medium based on Fluorobrite DMEM for mESCs (ThermoFisher A1896701) and in phenol-red N2B27 with BMP4 for astrocytes (ThermoFisher 12348017). We underline the importance of performing single molecule imaging in phenol-red free medium to both reduce the background fluorescence and minimize localization errors.

The experiments were performed 20 hours (labeled as 1 day) after adding auxin to culture medium. To achieve single molecule labelling cells were incubated with 1pM of Halo-JF549 for 20 minutes at room temperature (incubation followed by a first rinsing step, 15 minutes wait and another rinsing). While waiting for the second rinsing step cells were incubated with 1 $\mu$ M Hoechst and consequently washed to minimize the fluorophores unbound in solution. All washings were performed using cell culture medium; the coverslips treated with auxin were washed with medium enriched with auxin. During the experiments cells were kept at 37° and 5% CO<sub>2</sub> with a Tokai Hit heating system (INUBG2E-PPZI).

To locate nuclei, cells were stained with Hoechst 33342 (bisBenzimide H 33342 trihydrochloride, Sigma-Aldrich, ref 14533), excited with 405 nm light. The CTCF-GFP was imaged in the 488 nm channel. To track Cohesin-Halo-JF549, the sample was excited with the 561 nm laser. At least 5000 frames were recorded in a continuous imaging regime, the laser being controlled by the camera. Laser power was approximately 0.1 kW/cm<sup>2</sup> and adjusted depending on the exposure time in order to keep the amount of excitation photons constant.

To determine the fraction of bound molecules we acquired images in a continuous regime at a frame rate of 197Hz (5ms). For the analysis of the dynamics (MSD) and the residence time we acquired videos at a rate of 20Hz (50ms).

#### Quantification of photobleaching

To characterize the photobleaching of the organic dye used for our Single Particle Tracking experiments (SPT), we acquired movies in the same imaging conditions of the SPT experiments in terms of laser power and exposure. Cells were stained with the JF549 organic dye<sup>8</sup> at 1nM for a bulk labelling. The plot in **Figure 1 – figure supplement 1** shows the average normalized bleaching curve for acquisitions made with an exposure time of 50ms with the same laser power used for the SPT experiments.

#### **Analysis of single particle tracking data**

To localize the single emitters and build the trajectories we used SLIMfast<sup>9</sup>, implemented in Matlab and based on the MTT algorithm<sup>10</sup>. The Point Spread Function (PSF) of a single emitter is fitted with a 2D-gaussian, whose center corresponds to the position of the fluorophore with a sub-pixel resolution.

#### Analysis of bound fractions

To quantify the fraction of bound molecules we used data acquired at 5 ms exposure in a continuous imaging regime. The actual framerate acquisition is 197Hz (5.08 ms), due to the frame transfer lag to the camera. We chose to use the data from the fastest acquisition rate to include the fastest diffusing population, which blurred when imaging with 50ms exposure time.

Particles were tracked as described above and we computed the distribution of the step sizes of the protein of interest. The trajectories consisted of at least one step, or 2 localizations. A two-state model was chosen to fit our data. The computation of the fraction of bound molecules is corrected for the subset of free molecules that may leave the focal plane<sup>11</sup>. The fit was performed on the Cumulative Distribution Function (CDF) to avoid biases due to the binning choice.

#### Residence times

To further characterize the binding kinetics, we extrapolated the trajectories that stayed confined in a circular area of radius  $r = 2$  pixels for the whole duration. With this pool of “immobile” trajectories we built the distribution of residence times and consequently computed the Survival Probability. Such distribution of residence times is defined as the inverse cumulative probability, or the probability for a molecule to have a life longer than  $t_0$ :  $\int_{t_0}^{\infty} P(t)dt$

Given the intrinsic limitations of single molecule imaging when probing very stable binding events (as for Cohesin) we use the Survival Probability curves to qualitatively sample the discrepancies between the different biological conditions.

#### Analysis of diffusion dynamics

The trajectories obtained from experiments at 50ms were analyzed with custom codes implemented in Matlab. First, we computed the time-averaged Mean Squared Displacement (MSD) as  $MSD = \langle x(t+n\Delta t) - x(t) \rangle$ , where  $x(t)$  is the position at time point  $t$ ;  $n = 1, 2, \dots, N$ , with  $N$  = maximum number of time points in a trajectory, and  $\langle \rangle$  indicating the ensemble average over all the possible time lags of one individual trajectory.

We selected the trajectories with at least 10 localizations. In spite of the low JF549 ligand concentration the beginning of the videos are very dense in point emitters. We therefore cut the first hundred frames of the raw movies, and we only performed tracking on images with approximately 10 molecules per frame. We did not threshold data used to quantify the fraction of bound molecules nor to the estimation of the Survival Probability.

Once computed the MSD we extrapolated what we call the instantaneous diffusion coefficient ( $D_{inst}$ ) from each trajectory by fitting the MSD from point 2 to point 6. We followed the common approach of performing a linear fit, assuming a purely Brownian motion at the beginning of the MSD<sup>9,12</sup>.

### Detailed statistics

|                                                | 5ms(197 Hz) |                                  | 50ms (20 Hz) |                                   |
|------------------------------------------------|-------------|----------------------------------|--------------|-----------------------------------|
| cell line                                      | #cells      | #trajectories<br>length $\geq 3$ | #cells       | #trajectories<br>length $\geq 10$ |
| mESC RAD21-Halotag CTCF-AID untreated          | 14          | 13511                            | 15           | 1756                              |
| mESC RAD21-Halotag CTCF-AID +auxin 1 day       | 16          | 13118                            | 15           | 1277                              |
| Astrocytes RAD21-Halotag CTCF-AID untreated    | 15          | 4067                             | 14           | 524                               |
| Astrocytes RAD21-Halotag CTCF-AID +auxin 1 day | 15          | 9495                             | 14           | 1090                              |
| mESC RAD21-Halotag Sororin-AID untreated       | 11          | 526                              | 12           | 285                               |
| mESC RAD21-Halotag Sororin-AID +auxin 6 hours  | 15          | 11491                            | not done     | not done                          |
| mESC CTCF-2A-Halotag-NLS (control)             | 14          | 1620                             | not done     | not done                          |
| mESC RAD21-Halotag                             | 13          | 15196                            | 16           | 6830                              |

For auxin treated Sororin cells blocked in mitosis, we only performed 5ms acquisition because >80% of molecules are freely diffusing (Fig. 1), resulting in blurred signal when acquiring for 50ms.

### Statistics related to **Figure 1 – figure supplement 1e**

| Cell ID | #trajectories |
|---------|---------------|
| 1       | 165           |
| 2       | 157           |
| 3       | 62            |
| 4       | 150           |



|    |     |
|----|-----|
| 5  | 118 |
| 6  | 94  |
| 7  | 76  |
| 8  | 141 |
| 9  | 61  |
| 10 | 107 |
| 11 | 115 |
| 12 | 63  |
| 13 | 126 |
| 14 | 77  |
| 15 | 130 |

### Immunostaining

mESCs were grown on glass-coverslips, fixed with 3% formaldehyde in 1XPBS for 10' at room temperature. Permeabilization was carried out in 0.5% Triton followed by blocking with 1% BSA diluted in 1X PBS (Gemini cat 700-110) for 15min at room temperature. Primary antibody incubation was performed at room temperature for 45min (Monoclonal ANTI-FLAG® M2 antibody produced in mouse Millipore-Sigma F1804 at 1/250 dilution), followed by three 5 min washes in 1X PBS, secondary antibody incubation (AlexaFluor594 Goat anti-Mouse IgG Invitrogen A-11005 at 1/10.000 dilution), three 5 min washes in 1X PBS, counter-staining with DAPI and mounting in 90% glycerol – 0.1X PB – 0.1% p-phenylenediamine pH9. Images were acquired on a Zeiss spinning disk with 60X objective. In order to avoid loss of loosely-attaching mitotic cells for the H3S10 immunostaining in Sororin-AID cells, cells were detached with TrypLE, spun in culture medium, resuspended in PBS and let to attach for 10min in 1XPBS 25µl droplets spotted onto 0.1% poly-L-Lysine coated coverslips. Cells were then processed as described above, except that the primary antibody used was Anti-H3S10Ph, rabbit polyclonal Millipore 05-636.

### Flow cytometry

mESCs were dissociated with TrypLE, resuspended in culture medium, spun, and resuspended in 4% FBS-PBS before live flow cytometry on a MACSQuant instrument (Miltenyibiotec). Dissociation, wash, and flow buffers were supplemented with auxin, when appropriate, to avoid re-expression of the CTCF-AID-eGFP fusion. Analysis was performed using the Flowjo software.

### Western blots

mESCs were dissociated, resuspended in culture medium, pelleted, washed in PBS, pelleted again and kept at –80°C. 15-20 million cells were used to prepare nuclear extracts. Cell pellets were resuspended in 10mM HEPES pH 7.9, 2.5mM MgCl<sub>2</sub>, 0.25M sucrose, 0.1% NP40, 1mM DTT, 1X HALT protease inhibitors (ThermoFisher) and swell for 10 min on ice. After centrifugation at 500 g nuclei were resuspended in on ice in (25mM HEPES pH 7.9, 1.5mM MgCl<sub>2</sub>, 700 mM NaCl, 0.5mM DTT, 0.1 mM EDTA, 20% glycerol, 1mM DTT, 250 U Benzonase and incubated on ice for 10min. Insoluble materials were pelleted by centrifugation

at 18,000 g at 4°C for 10 min and supernatant (nuclear extracts) were stored at -80C. Protein concentration from supernatants were measured using the Pierce Coomassie Plus assay kit (ThermoFisher).

For CTCF Western blot in **Figure 2 – figure supplement 1**, 40ug of nuclear extracts were loaded per lane. Samples were mixed with Laemmli buffer and 2.5% beta-mercaptoethanol, then loaded onto a Bolt 4%-12% Bis-Tris Plus gel (ThermoFisher). Gels were wet transferred onto PVDF membranes in transfer buffer (25mM Tris-Base, 192mM Glycine, & 10% Methanol) for 3 hours at 80V. Membranes were blocked for 2 hours with Odyssey blocking buffer (Li-Cor cat. 927-40000) and subsequently incubated with primary antibody overnight at 4°C (1:1000 anti-CTCF C-terminus Millipore 61311 and 1:2000 anti-TBP Abcam ab51841) in Odyssey blocking buffer. Membranes were washed three times in TBT-0.1% Tween, 5-10 minutes per wash, and were incubated with secondaries at room temperature for 1 hour (1:10000 HRP-anti-rabbit Cell Sig #7074 and 1:10000 HRP-anti-mouse Cell Sig #7076). Blots were wash 3 times for 5-10 minutes in TBS-0.1% Tween. CTCF blot used Amersham ECL Prime Western Blotting Detection Reagent (GE RPN2236) and TBP blot used Amersham ECL Western Blotting Detection Kit (GE RPN2108) for HRP activation. Blots were then exposed onto x-ray films for different exposure times.

## ChIP-seq

### Preparation of Spike-in chromatin from S2 cells

Cells were detached from culture dish by splashing them gently but thoroughly with culture medium, and transferred to 15mL conical tube **before** spinning 1000g for 3 min. Cells were resuspended at  $10^6$  cells/mL in complete S2 culture medium at room temperature. 270uL of 37% Formaldehyde (Electron Microscopy Sciences) for a final concentration of 1%, and agitated on an orbital shaker for 10min @ RT. 510uL 2.5M glycine (final concentration 125mM) was added and cells were left agitating for 5min @ RT, then spun at 1000g for 2min, 4C. Fixed cells were wash once in 1mL cold 1XPBS-0.125M Glycine, Spin at 1000g for 3min, 4C. Cells were used for sonication without prior freezing, as we noticed that snap freezing dramatically altered shearing efficiency. Fresh cell pellets containing were resuspended in 1mL Cell lysis buffer (20mM Tris HCl pH8.0, 85mM KCl, 0.5% IGEPAL and 1X Halt protease inhibitors ThermoFisher PI78425) ,) and incubated on ice for 10min. Nuclei were pelleted by spinning at 2500g for 5min at 4C and lysed in 50mM Tris HCl pH8.0, 10mM EDTA, 1% SDS and 1X Halt protease inhibitors for 30min on ice. Chromatin was sheared using a Covaris S220 ultrasonicator 5% Duty cycle, 5 intensity and 200 cycles/burst for 7min. Debris were pelleted by centrifugation at 1500g for 5min. Supernatant was transferred in a new tube and glycerol was added to 10% final before freezing at -80C as single use aliquots. For each ChIP experiment, 600ng of Drosophila chromatin (as estimated from the amount of DNA retrieved after reverse-crosslinking) was used in combination with sonicated chromatin obtained from 10 million mESCs.

### Rad21 ChIP-seq in Figure 1

The first set of Rad21 ChIP-seq was performed in parallel of CTCF ChIP-seq in the CTCF-AID mESCs clone EN52.9.1 published in 2017<sup>2</sup>, using 10mg of antibody abcam ab992 together with 40ng of Drosophila melanogaster spike-in chromatin (Active motif 53083) and spike-in antibody (Active motif 61686). These tracks are tagged as “2017protocol” in the supplementary table and companion GEO submission of this study.

### Rad21 and FLAG ChIP-seq in Figure 3

FLAG and Rad21 ChIP-seq in mESCs containing CTCF rescue transgenes, as well as replicates of the parental CTCF-AID line EN52.9.1 post 2017, were prepared with a protocol differing from data in Figure 1 by the lysis and wash buffers. For the full-length transgene we used the high-expressing clone (EN133.10) to be closest to the expression level of the  $\Delta N(1-265)$  clones.

For fixation, mESCs were dissociated using TrypLE and resuspended in 10% FBS in PBS, counted and adjusted to 1 million cells per mL. Formaldehyde was then added to 1% final followed by 10 min incubation at room temperature. Quenching was performed by adding 2.5M Glycine-PBS to 0.125M final followed by 5 min incubation at room temperature, 15 min incubation at 4°C, centrifugation at 200 g 5 min at 4°C, resuspended with 0.125M Glycine in PBS at 10 million cells per mL, aliquoted, spun at 200 g 5 min at 4°C and snap frozen on dry ice.

Fixed cells were thawed on ice, resuspended in ice cold 20mM Tris HCl PH8.0, 85mM KCl, 0.5% IGEPAL and 1X HALT protease inhibitor, counted and readjusted to obtain 10 million cells total exactly, incubated on ice 15 min, centrifuged at 500 g 5 min at 4°C, resuspended in 1mL 20mM Tris HCl pH8.0, 0.1% SDS, 0.5% Sodium Deoxycholate and 1X HALT protease inhibitor, transferred to a MilliTube (Covaris). Chromatin was sheared on a Covaris S2 sonicator for 15 cycles at 5% duty cycle, intensity 8, 200 cycles per burst in a waterbath maintained at 4°C, using 1 min sonication – 30 s rest, resulting in fragments. Samples were clarified by centrifugation at 18,000 g at 4°C for 10 min. Supernatants were transferred to 15mL conicals and 600ng of spike-in Drosophila chromatin (home made) was added. 10% of the mixture was saved as input and the rest was diluted to 5mL with ice-cold 16.7mM Tris-HCl pH 7.4, 167mM NaCl, 0.01% SDS, 1.1% Triton X-100, 1.2mM EDTA, 1X protease inhibitor. 10µg of anti-FLAG (Millipore-Sigma F1804) or anti-Rad21 (Abcam 992) together with 4µg spike-in antibody (anti-H2Av, Active motif) together with 4µg spike-in antibody (Active motif) was added alongside with 40µL prewashed protein G Dynabeads (ThermoFisher) followed by overnight incubation at 4°C on a rotator. Beads were collected using a magnetic stand, transferred into 2mL tubes and washed with 1mL twice 5min with 20mM Tris HCl pH 8.0, 150mM NaCl, 2mM EDTA, 0.1% SDS, 1% Triton X 100, twice 5min with 20mM Tris HCl pH 8.0, 500mM NaCl, 2mM EDTA, 0.1% SDS, 1% Triton X 100, twice 5min with 10mM Tris HCl pH 8.0, 0.25M LiCl, 1mM EDTA, 1% NP40, 1% Sodium Deoxycholate, and rinsed twice with 1X TE buffer. DNA was eluted twice by resuspending washed beads with 50uL 1% SDS, 0.1M NaHCO<sub>3</sub> and incubating for 30min and pooling eluates. Saved input DNA was diluted in the same buffer and treated similarly. 1mL of 10mg/ml DNase free RNase A was added and eluates were incubated at 37C for 30 minutes, prior to addition of Add 1ul of 20mg/ml Proteinase K and 12ul of 5M NaCl and overnight incubation at 65C. The next day DNA was clean either using Ampure Beads (FLAG ChIPs) or Qiagen PCR cleanup minelute kit, eluting in 32mL. DNA was then used for library preparation exactly as described<sup>2</sup>, using the entire eluate for ChIP-seq and 40ng for inputs.

### ChIP-seq analysis

Mapping and peak calling was performed as exactly as described previously<sup>2</sup>. Published<sup>2</sup> CTCF ChIP-seq peaks in untreated and auxin-treated CTCF-AID mESCs were used to identify total and auxin-sensitive CTCF peaks. Fraction of reads in peaks (FRIP) scores were calculated by calculating the proportion of uniquely mapping reads within auxin-sensitive CTCF peaks compared to the total number of uniquely mapping reads, and excluding genomic regions known to display artificial ChIP-seq signal<sup>13</sup> retrieved from <https://sites.google.com/site/anshulkundaje/projects/blacklists>

Published<sup>14</sup> datasets from accession GSE63518 were mapped to dm3 and peak calling was performed as exactly as described previously<sup>2</sup>. Data presented in figure 1 were obtained using the commercial Active motif spike in reagents where spike-in calibration yielded consistent results. For Rad21 ChIP-seq in mESCs with the CTCF transgenes (figure 3) we noticed that spike-in normalization gave inconsistent results, artificially rescaling up or down Rad21 scores beyond reason and inconsistently between replicates. To avoid these artifacts we display FLAG and Rad21 analyses without recalibration. Reads were mapped separately to mm9 and dm3 as described<sup>2</sup>, eliminating low-quality reads, PCR duplicates and multi-mapping reads. Tracks and density plots were generated using Easeq<sup>15</sup> <http://easeq.net/>.

### Chromosome Conformation Capture Carbon-Copy (5C)

5C was performed exactly as described<sup>2</sup>.

#### 5C analysis

Sequencing and mapping was performed as described<sup>2</sup>. Matrices were then iteratively corrected at the fragment level and normalized to sum to 1e6. Iterative Correction was performed on raw unbinned matrices (fragment level from the alternating 5C primer design) using `iterative_correction_asymmetric` with default values, (cooltools, <https://github.com/mirnylab/cooltools>). 5C heatmaps data depicted in the figures were obtained after binning the corrected matrices at 15kb by taking the median over all primer pairs that fall within each pair of bins.

To minimize possible artifacts when calculating insulation scores, we binned the matrices at 20kb by taking the mean over all primer pairs that fall within each pair of bins. The first two diagonals of the binned matrix were then filled with the mean of the second diagonal. Combined insulation scores for each sample were calculated for the binned corrected matrices by aggregating over the same set of boundary positions across samples. Boundaries were identified in untreated CTCF-AID mESCs without any CTCF transgene (GEO accession GSE98671 samples GSM2609248, GSM2609253 and GSM2609256)<sup>2</sup> by taking the minima of the insulation profile, as previously<sup>2</sup>. Insulation scores were calculated with a 100kb window, as previously<sup>2</sup>. These minima were then filtered to exclude those that are shared with those upon auxin-mediated degradation of CTCF-AID for 4 days in mESCs (GSM2609254, GSM2609259) (to eliminate CTCF-independent boundaries - *e.g.* compartment transitions). Combined insulation scores averaged across all replicates (Fig. 2) were calculated as the mean across boundary positions and averaged across replicas, for each cell line separately. To calculate insulation relative to Full-length transgenes, averages of mutant cDNAs were divided by the average obtained with the reference Full-length transgene. The genomic position of the CTCF-dependent boundaries used were:

| chr  | start     | stop      |
|------|-----------|-----------|
| chrX | 99151148  | 99171148  |
| chrX | 99411148  | 99431148  |
| chrX | 100451148 | 100471148 |
| chrX | 100671148 | 100691148 |
| chrX | 101211148 | 101231148 |
| chrX | 103211148 | 103231148 |

Similar results were obtained when using the four most visually prominent boundaries.

Differential heatmaps were generated by binning each matrix independently and subtracting the 5C counts from the reference matrix.

### References of Methods

1. Tsukamoto, T. *et al.* Visualization of gene activity in living cells. *Nat. Cell Biol.* **2**, 871–878 (2000).
2. Nora, E. P. *et al.* Targeted Degradation of CTCF Decouples Local Insulation of Chromosome Domains from Genomic Compartmentalization. *Cell* **169**, 930–944.e22 (2017).
4. Farrar, D. *et al.* Mutational Analysis of the Poly(ADP-Ribosyl)ation Sites of the Transcription Factor CTCF Provides an Insight into the Mechanism of Its Regulation by Poly(ADP-Ribosyl)ation. *Mol. Cell. Biol.* **30**, 1199–1216 (2010).
5. MacPherson, M. J., Beatty, L. G., Zhou, W., Du, M. & Sadowski, P. D. The CTCF insulator protein is posttranslationally modified by SUMO. *Mol. Cell. Biol.* **29**, 714–725 (2009).
6. Kranz, A. *et al.* An improved Flp deleter mouse in C57Bl/6 based on Flpo recombinase. *Genes. N. Y. N* **2000** **48**, 512–520 (2010).
7. Tokunaga, M., Imamoto, N. & Sakata-Sogawa, K. Highly inclined thin illumination enables clear single-molecule imaging in cells. *Nat. Methods* **5**, 159–161 (2008).
8. Grimm, J. B. *et al.* A general method to improve fluorophores for live-cell and single-molecule microscopy. *Nat. Methods* **12**, 244–250 (2015).
9. Normanno, D. *et al.* Probing the target search of DNA-binding proteins in mammalian cells using TetR as model searcher. *Nat. Commun.* **6**, 7357 (2015).
10. Sergé, A., Bertaux, N., Rigneault, H. & Marguet, D. Dynamic multiple-target tracing to probe spatiotemporal cartography of cell membranes. *Nat. Methods* **5**, 687–694 (2008).
11. Hansen, A. S. *et al.* Robust model-based analysis of single-particle tracking experiments with Spot-On. *eLife* **7**, (2018).
12. Saxton, M. J. & Jacobson, K. Single-particle tracking: applications to membrane dynamics. *Annu. Rev. Biophys. Biomol. Struct.* **26**, 373–399 (1997).
13. Amemiya, H. M., Kundaje, A. & Boyle, A. P. The ENCODE Blacklist: Identification of Problematic Regions of the Genome. *Sci. Rep.* **9**, 9354 (2019).
14. Li, L. *et al.* Widespread rearrangement of 3D chromatin organization underlies polycomb-mediated stress-induced silencing. *Mol. Cell* **58**, 216–231 (2015).
15. Lerdrup, M., Johansen, J. V., Agrawal-Singh, S. & Hansen, K. An interactive environment for agile analysis and visualization of ChIP-sequencing data. *Nat. Struct. Mol. Biol.* **23**, 349–357 (2016).
16. Abdennur, N. & Mirny, L. A. Cooler: scalable storage for Hi-C data and other genomically labeled arrays. *Bioinformatics* doi:10.1093/bioinformatics/btz540
